# Supplementary material
Source: MDPI journal article supplement (https://www.mdpi.com/2304-6740/11/6/244)
Supplement: s1 [file s1]

## ***Supporting Info***

**for**

### ***New insights into the catalytic activity of second generation Hoveyda-Grubbs complexes having phenyl substituents on the backbone***

Assunta D'Amato <sup>1</sup>, Annaluisa Mariconda <sup>2,\*</sup> and Pasquale Longo <sup>1</sup>

<sup>1</sup>Department of Chemistry and Biology, University of Salerno, Via Giovanni Paolo II, 132,  
84084 Fisciano, Italy; asdamato@unisa.it (A.D.); plongo@unisa.it (P.L.)

<sup>2</sup>Department of Science, University of Basilicata, Viale dell'Ateneo Lucano, 10, 85100 Potenza, Italy

\*Correspondence: annaluisa.mariconda@unibas.it

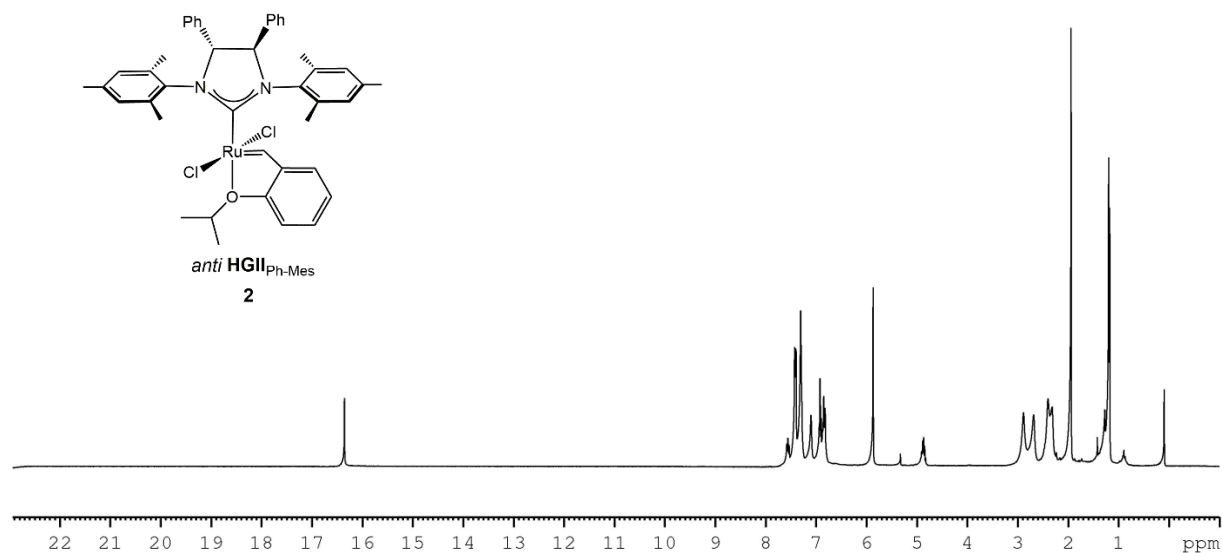

**Figure S1.**  $^1\text{H}$  NMR (300 MHz,  $\text{CD}_2\text{Cl}_2$ ):  $\delta$  16.3<sub>5</sub> (s, 1H, Ru=CHPh); 7.5<sub>7</sub>-6.8<sub>4</sub> (m, 18H, aromatic carbons); 5.8<sub>6</sub> (s, 2H, N(CHPh)<sub>2</sub>N); 4.8<sub>7</sub> (septet, 1H, (CH<sub>3</sub>)<sub>2</sub>CHOAr); 2.8<sub>8</sub>-1.1<sub>8</sub> (24H, OCH(CH<sub>3</sub>)<sub>2</sub> + 6xCH<sub>3</sub> mesityl).

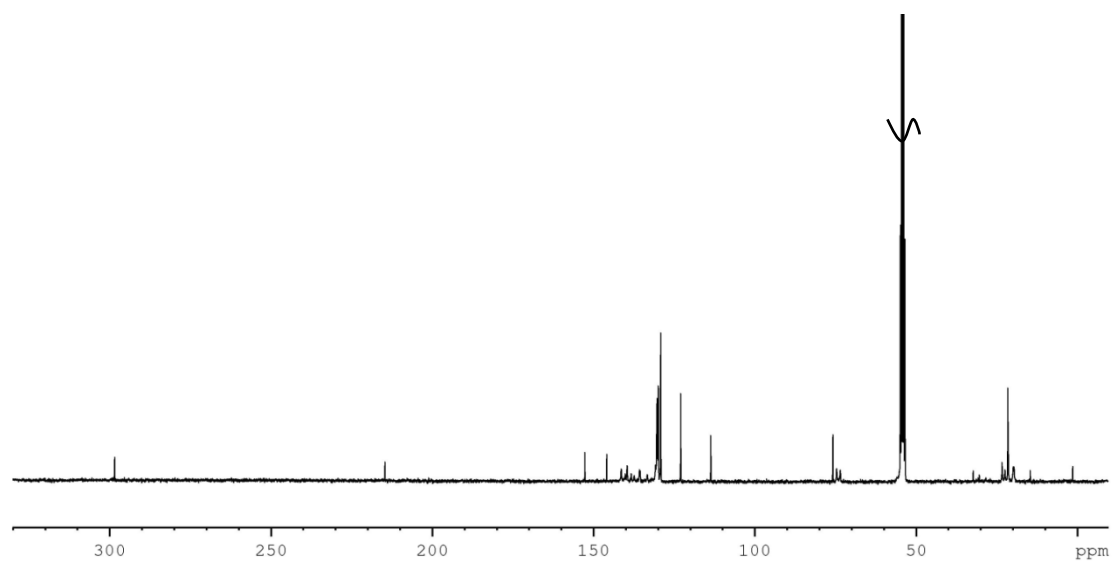

**Figure S2.**  $^{13}\text{C}\{^1\text{H}\}$  NMR (100 MHz,  $\text{CD}_2\text{Cl}_2$ ):  $\delta$  298.3 (Ru=CH-*o*OiPrC<sub>6</sub>H<sub>4</sub>); 214.5 (NCN), 152.5; 145.7; 141.3; 140.0; 139.4; 138.1; 137.2; 135.6; 133.2; 130.6; 130.2; 130.1; 129.9; 129.7; 129.0; 122.8; 113.4; 75.6 (OC(CH<sub>3</sub>)<sub>2</sub>); 74.5 (N(CHPh)<sub>2</sub>N); 73.4 (N(CHPh)<sub>2</sub>N); 32.1; 23.2; 22.2; 21.3; 19.7; 19.4 (methyl groups).

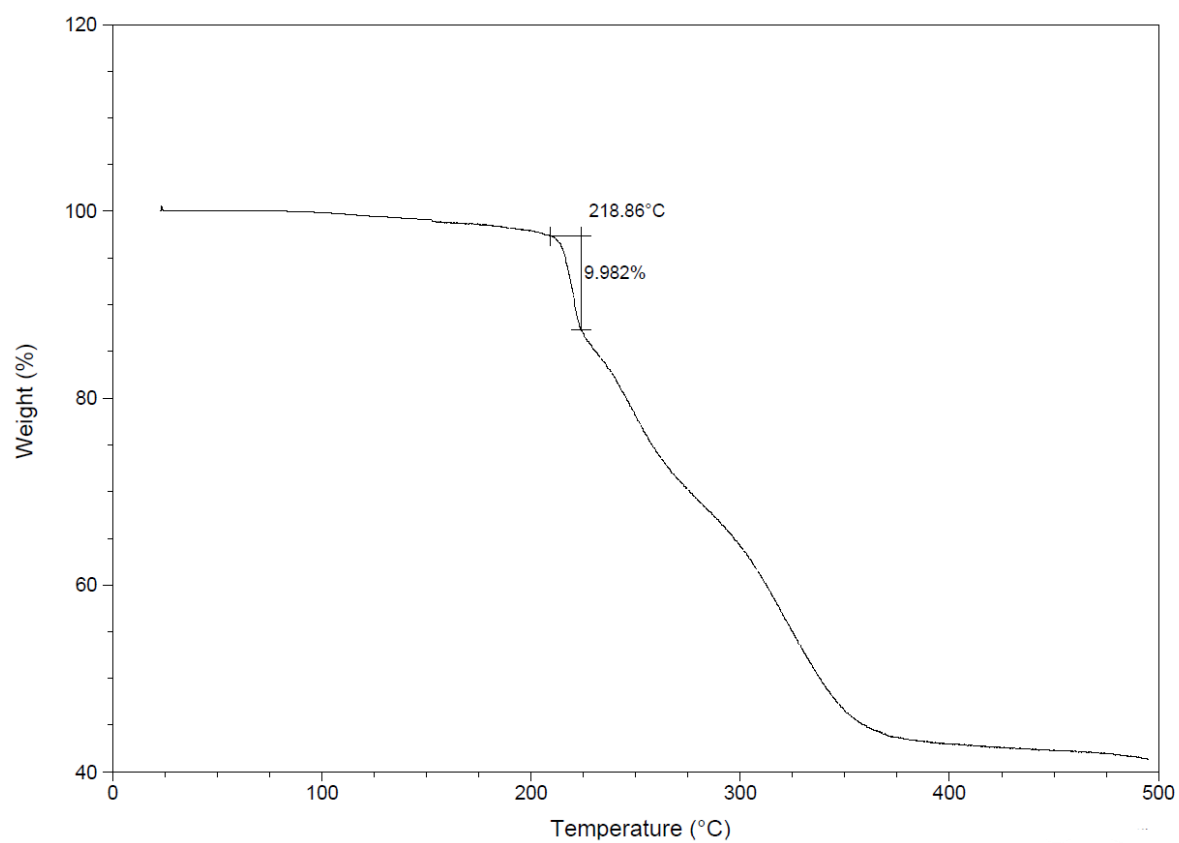

**Figure S3.** Thermogravimetric analysis (TGA) of HGII.

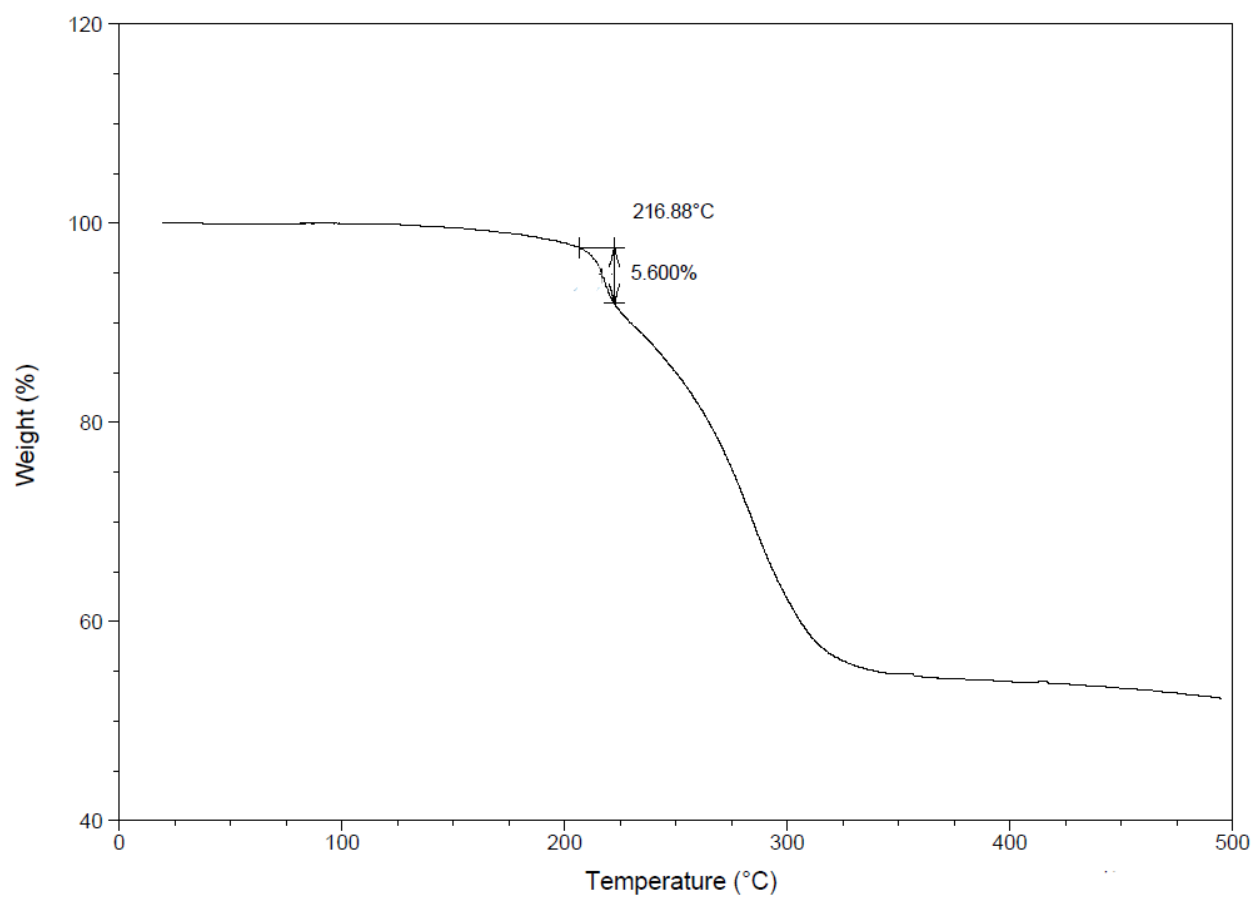

**Figure S4.** Thermogravimetric analysis (TGA) of HGII<sub>Ph-Mes</sub>.

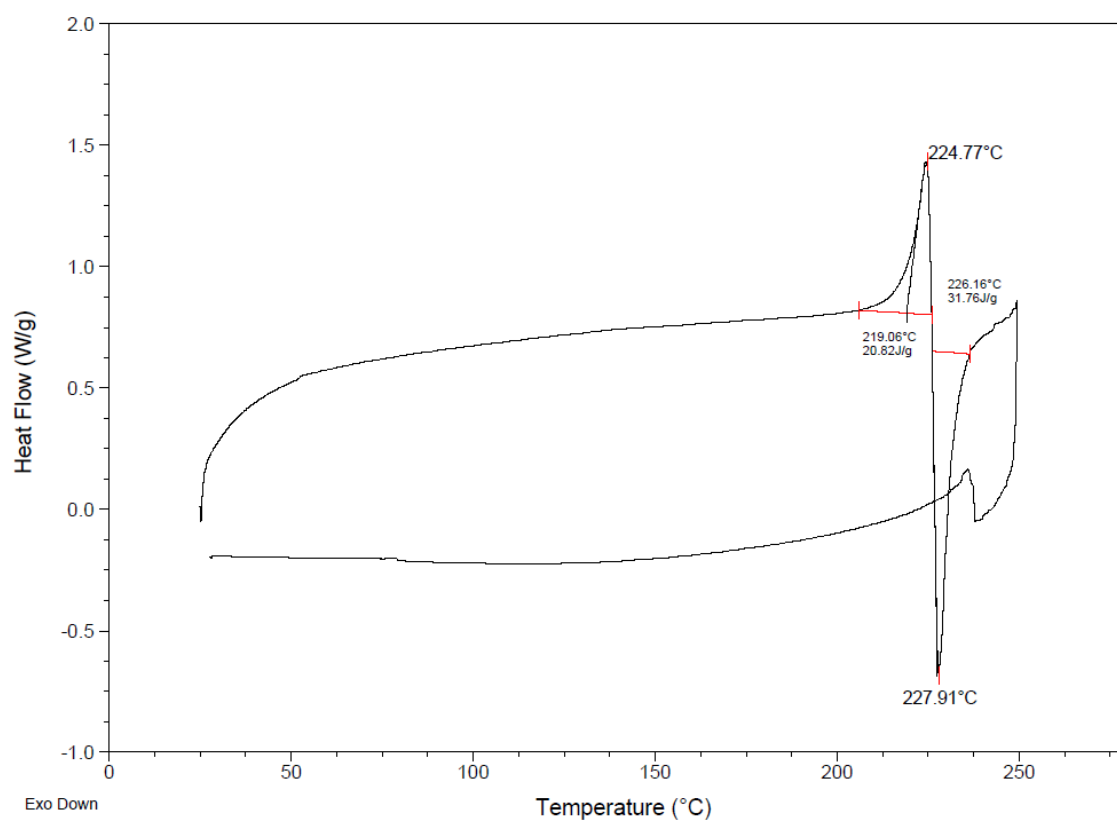

**Figure S5.** Differential scan calorimetry analysis (DSC) of HGII.

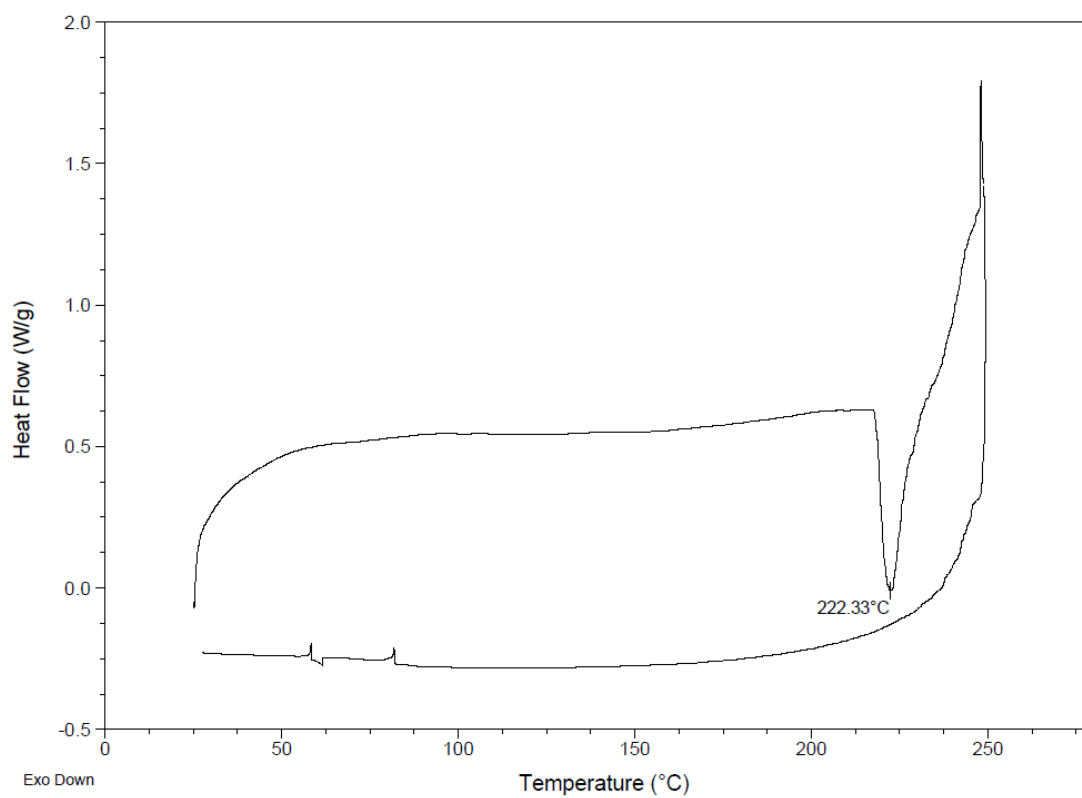

**Figure S6.** Differential scan calorimetry analysis (DSC) of HGII<sub>Ph-Mes</sub>.
